# Supplementary material
Source: PubMed Central journal article supplement (PMC1180746)
Supplement: nar_33_13_4140__1.pdf [file nar_33_13_4140__1.pdf]

**Table S1**

---

**EGFP Sequences**

|           |                                              |                        |
|-----------|----------------------------------------------|------------------------|
| <b>5'</b> | <b>caagctgaccctgaagtctcatctgcaccaccggcaa</b> | <b>EGFP Site-1</b>     |
| 5'        | ACCCUGAAGUUCAUCUGCACC                        | EGFPS1 21/21           |
| 3'        | ACUGGGACUUCAAGUAGACGU                        |                        |
| 5'        | ACCCUGAAGUUCAUCUGCACCA                       | EGFPS1 R 22/22         |
| 3'        | ACUGGGACUUCAAGUAGACGUG                       |                        |
| 5'        | GACCCUGAAGUUCAUCUGCACC                       | EGFPS1 L 22/22         |
| 3'        | GACUGGGACUUCAAGUAGACGU                       |                        |
| 5'        | pACCCUGAAGUUCAUCUGCACC <b>accg</b>           | EGFPS1 R 25D/27        |
| 3'        | ACUGGGACUUCAAGUAGACGUGGUGGC                  |                        |
| 5'        | AAGCUGACCCUGAAGUUCAUCUGCACC                  | EGFPS1 L 27/25D        |
| 3'        | <b>ttc</b> GACUGGGACUUCAAGUAGACGU <b>p</b>   |                        |
| <b>5'</b> | <b>ccatgaagcagcagcacttcttcaagtccgccaatgc</b> | <b>EGFP Site-2</b>     |
| 5'        | AAGCAGCACGACUUCUUCAAGUCCGCC                  | EGFPS2 R 27/27         |
| 3'        | UUCGUCGUGCUGAAGAAGUUCAGGCCG                  |                        |
| 5'        | <b>aag</b> CAGCACGACUUCUUCAAGUCCGCC          | EGFPS2 R 27 (5' D) /27 |
| 3'        | UUCGUCGUGCUGAAGAAGUUCAGGCCG                  |                        |
| 5'        | AAGCAGCACGACUUCUUCAAGUCC <b>gcc</b>          | EGFPS2 R 27 (3' D) /27 |
| 3'        | UUCGUCGUGCUGAAGAAGUUCAGGCCG                  |                        |
| 5'        | AAGCAGCACGACUUCUUCAAGUCCGCC                  | EGFPS2 R 27/27 (3' D)  |
| 3'        | <b>ttc</b> GUCGUGCUGAAGAAGUUCAGGCCG          |                        |
| 5'        | AAGCAGCACGACUUCUUCAAGUCCGCC                  | EGFPS2 R 27/27 (5' D)  |
| 3'        | UUCGUCGUGCUGAAGAAGUUCAG <b>ggc</b>           |                        |
| 5'        | AAGCAGCACGACUUCUUCAAGUCCGCC                  | EGFPS2 R 27/25         |
| 3'        | UUCGUCGUGCUGAAGAAGUUCAGGC                    |                        |
| 5'        | AAGCAGCACGACUUCUUCAAGUCCGCC                  | EGFPS2 R 27/25 (3' D)  |
| 3'        | <b>ttc</b> GUCGUGCUGAAGAAGUUCAGGC            |                        |
| 5'        | GCAGCACGACUUCUUCAAGUCCGCC                    | EGFPS2 R 25/27         |
| 3'        | UUCGUCGUGCUGAAGAAGUUCAGGCCG                  |                        |
| 5'        | pGCAGCACGACUUCUUCAAGUCC <b>gcc</b>           | EGFPS2 R 25D/27        |
| 3'        | UUCGUCGUGCUGAAGAAGUUCAGGCCG                  |                        |
| 5'        | CAUGAAGCAGCACGACUUCUUCAAGUC                  | EGFPS2 L 27/25D        |
| 3'        | <b>gt</b> ACUUCGUCGUGCUGAAGAAGUUC <b>p</b>   |                        |
| 5'        | GCAGCACGACUUCUUCAAGUC                        | EGFPS2 21/21           |
| 3'        | UUCGUCGUGCUGAAGAAGUUC                        |                        |
| 5'        | GCAGCACGACUUCUUCAAGUCC                       | EGFPS2 R 22/22         |
| 3'        | UUCGUCGUGCUGAAGAAGUUCA                       |                        |
| 5'        | AGCAGCACGACUUCUUCAAGUC                       | EGFPS2 L 22/22         |
| 3'        | CUUCGUCGUGCUGAAGAAGUUC                       |                        |

## hnRNPH Sequences

| 5' <b>ttgttgaacttgaatcagaagatgaagtcaaattggc</b> 3'                              | hnRNPH Sites 1 & 3 |
|---------------------------------------------------------------------------------|--------------------|
| 5' AACUUGAAUCAGAAGAUGAAG<br>3' ACUUGAACUUAGUCUUCUACU                            | H1 21/21           |
| 5' pAACUUGAAUCAGAAGAUGAAGUC <b>aa</b><br>3' ACUUGAACUUAGUCUUCUACUUCAGUU         | H1 R 25D/27        |
| 5' pAACUUGAAUCAGAAGAUGAAGUC <b>aa</b><br>3' <b>ac</b> UUGAACUUAGUCUUCUACUUCAGUU | H1 R 25D/27D       |
| 5' UUGUUGAACUUGAAUCAGAAGAUGAAG<br>5' <b>aa</b> CAACUUGAACUUAGUCUUCUACUp         | H1 L 27/25D        |
| 5' CUUGAAUCAGAAGAUGAAGUC<br>3' UUGAACUUAGUCUUCUACUUC                            | H3 21/21           |
| 5' pCUUGAAUCAGAAGAUGAAGUCA <b>Aat</b><br>3' UGAACUUAGUCUUCUACUUCAGUUUA          | H3 R 25D/26        |
| 5' pCUUGAAUCAGAAGAUGAAGUCA <b>Aat</b><br>3' UUGAACUUAGUCUUCUACUUCAGUUUA         | H3 R 25D/27        |
| 5' pCUUGAAUCAGAAGAUGAAGUCA <b>Aat</b><br>3' <b>tt</b> GAACUUAGUCUUCUACUUCAGUUUA | H3 R 25D/27D       |
| 5' pCUUGAAUCAGAAGAUGAAGUCA <b>Aat</b><br>3' CUUGAACUUAGUCUUCUACUUCAGUUUA        | H3 R 25D/28        |
| 5' pCUUGAAUCAGAAGAUGAAGUCA <b>Aat</b><br>3' ACUUGAACUUAGUCUUCUACUUCAGUUUA       | H3 R 25D/29        |
| 5' GUUGAACUUGAAUCAGAAGAUGAAGUC<br>3' <b>ca</b> ACUUGAACUUAGUCUUCUACUUCp         | H3 L 27/25D        |

## hnRNPH Site 3, 3'-overhang variant sequences

| 5' <b>ttgttgaacttgaatcagaagatgaagtcaaattggc</b> 3'                             | hnRNPH Site 3 |
|--------------------------------------------------------------------------------|---------------|
| 5' pCUUGAAUCAGAAGAUGAAGUCA <b>Aat</b><br>3' <u>UUGAACUUAGUCUUCUACUUCAGUUUA</u> | 3' UU         |
| 5' pCUUGAAUCAGAAGAUGAAGUCA <b>Aat</b><br>3' <u>UAGAACUUAGUCUUCUACUUCAGUUUA</u> | 3' UA         |
| 5' pCUUGAAUCAGAAGAUGAAGUCA <b>Aat</b><br>3' <u>UCGAACUUAGUCUUCUACUUCAGUUUA</u> | 3' UC         |
| 5' pCUUGAAUCAGAAGAUGAAGUCA <b>Aat</b><br>3' <u>UGGAACUUAGUCUUCUACUUCAGUUUA</u> | 3' UG         |
| 5' pCUUGAAUCAGAAGAUGAAGUCA <b>Aat</b><br>3' <u>AUGAACUUAGUCUUCUACUUCAGUUUA</u> | 3' AU         |
| 5' pCUUGAAUCAGAAGAUGAAGUCA <b>Aat</b><br>3' <u>AAGAACUUAGUCUUCUACUUCAGUUUA</u> | 3' AA         |
| 5' pCUUGAAUCAGAAGAUGAAGUCA <b>Aat</b><br>3' <u>ACGAACUUAGUCUUCUACUUCAGUUUA</u> | 3' AC         |
| 5' pCUUGAAUCAGAAGAUGAAGUCA <b>Aat</b><br>3' <u>AGGAACUUAGUCUUCUACUUCAGUUUA</u> | 3' AG         |
| 5' pCUUGAAUCAGAAGAUGAAGUCA <b>Aat</b><br>3' <u>CUGAACUUAGUCUUCUACUUCAGUUUA</u> | 3' CU         |
| 5' pCUUGAAUCAGAAGAUGAAGUCA <b>Aat</b><br>3' <u>CAGAACUUAGUCUUCUACUUCAGUUUA</u> | 3' CA         |
| 5' pCUUGAAUCAGAAGAUGAAGUCA <b>Aat</b><br>3' <u>CCGAACUUAGUCUUCUACUUCAGUUUA</u> | 3' CC         |

|    |                                     |       |
|----|-------------------------------------|-------|
| 5' | pCUUGAAUCAGAAGAUGAAGUCAAA <b>at</b> | 3' CG |
| 3' | <u>CGGAACUUAGUCUUCUACUUCAGUUUA</u>  |       |
| 5' | pCUUGAAUCAGAAGAUGAAGUCAAA <b>at</b> | 3' GU |
| 3' | <u>GUGAACUUAGUCUUCUACUUCAGUUUA</u>  |       |
| 5' | pCUUGAAUCAGAAGAUGAAGUCAAA <b>at</b> | 3' GA |
| 3' | <u>GAGAACUUAGUCUUCUACUUCAGUUUA</u>  |       |
| 5' | pCUUGAAUCAGAAGAUGAAGUCAAA <b>at</b> | 3' GC |
| 3' | <u>GCGAACUUAGUCUUCUACUUCAGUUUA</u>  |       |
| 5' | pCUUGAAUCAGAAGAUGAAGUCAAA <b>at</b> | 3' GG |
| 3' | <u>GGGAACUUAGUCUUCUACUUCAGUUUA</u>  |       |

## Luciferase Sequences

|    |                                             |                          |
|----|---------------------------------------------|--------------------------|
| 5' | <b>acgccctggttcctggaacaattgcttttacagatg</b> | <b>Luciferase Site-1</b> |
| 5' | CGCCCUUGUUCUGGAACAAUUGCUUU                  | Luc-1 L 27/25D           |
| 3' | <b>g</b> CGGGACCAAGGACCUUGUUAACGAp          |                          |
| 5' | pGGUUCUGGAACAAUUGCUUUU <b>aca</b>           | Luc-1 R 25D/27           |
| 3' | GACCAAGGACCUUGUUAACGAAAUGU                  |                          |
| 5' | <b>gacatcacttacgctgagtacttcgaatgtcogttc</b> | <b>Luciferase Site-2</b> |
| 5' | ACAUCACUUACGCUGAGUACUUCGAAA                 | Luc-2 L 27/25D           |
| 3' | <b>tg</b> UAGUGAAUGCGACUCAUGAAGCUp          |                          |
| 5' | pCUUACGCUGAGUACUUCGAAAUG <b>tc</b>          | Luc-2 R 25D/27           |
| 3' | GUGAAUGCGACUCAUGAAGCUUACAG                  |                          |
| 5' | <b>ttgcgcccggaacgacatttataatgaactggaat</b>  | <b>Luciferase Site-3</b> |
| 5' | UGCGCCCGCGAACGACAAUUUAUAUGA                 | Luc-3 L 27/25D           |
| 3' | <b>ac</b> GCGGGCGCUUGCUGUAAAUAUUAp          |                          |
| 5' | pCGCGAACGACAAUUUAUAUGAAC <b>gt</b>          | Luc-3 R 25D/27           |
| 3' | GGCGCUUGCUGUAAAUAUUACUUGCA                  |                          |
| 5' | <b>cgatthttgtgccagagtcttcgatagggacaagac</b> | <b>Luciferase Site-4</b> |
| 5' | GAUUUUGUGCCAGAGUCCUUCGAUAGG                 | Luc-4 L 27/25D           |
| 3' | <b>ct</b> AAAACACGGUCUCAGGAAGCUAU <b>p</b>  |                          |
| 5' | pGUGCCAGAGUCCUUCGAUAGGG <b>aca</b>          | Luc-4 R 25D/27           |
| 3' | AACACGGUCUCAGGAAGCUAUCCUGU                  |                          |

## La Sequences

|    |                                           |                  |
|----|-------------------------------------------|------------------|
| 5' | <b>gataaaactggatgaaggctgggtacctttggag</b> | <b>La Site-1</b> |
| 5' | pCUGGAUGAAGGCUGGGUACCUUU <b>gg</b>        | La R 25D/27      |
| 3' | UUGACCUACUUCGACCCAUGGAAACC                |                  |
| 5' | AUAAAACUGGAUGAAGGCUGGGUACUU               | La L 27/25D      |
| 3' | <b>ta</b> UUUUGACCUACUUCGACCCAUG <b>p</b> |                  |

---

**Table S1. RNA duplex sequences employed in this study.** Sense strand target sequences are shown and RNA duplexes are aligned beneath in duplex form with S strand top (5' → 3') and AS strand bottom (3' → 5'). RNA bases are upper case, DNA bases are lower case bold, and “p” represents 5'-phosphate.

**A**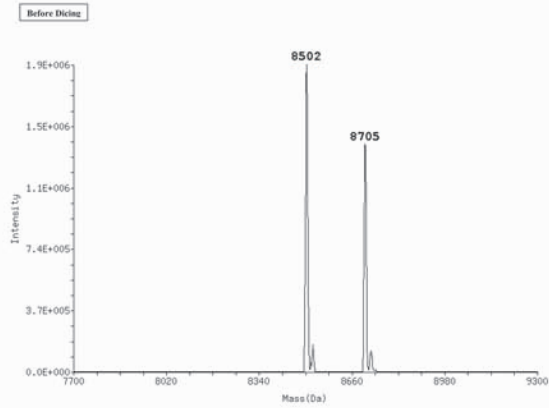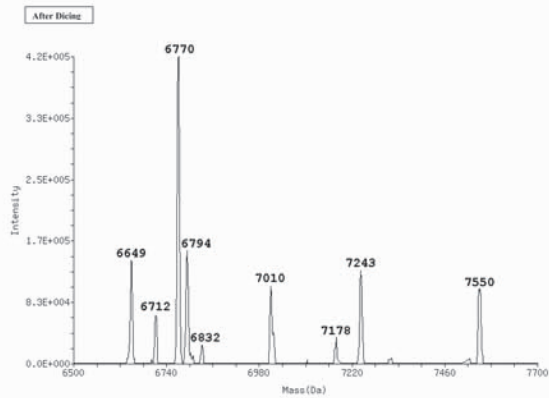

| Sequence: EGFP2 R 27(5'D)/27   | Mol Wt | Length |
|--------------------------------|--------|--------|
| 5' aagCAGCAGACUUCUUAAGUCCGCC   | 8503   | 27     |
| 3' UUCGUCGUGCUGAAGAAGUUCAGGCGG | 8705   | 27     |
| 5' pCAGCAGACUUCUUAAGUCCGCC     | 6648   | 21     |
| 3' UCGUGCUGAAGAAGUUCAGGCP      | 6832   | 21     |
| 5' UCGUGCUGAAGAAGUUCAGGCGp     | 7177   | 22     |
| 3' GUCGUGCUGAAGAAGUUCAGGCP     | 7177   | 22     |
| 5' pAGCAGCAGACUUCUUAAGUCCG     | 6712   | 21     |
| 3' CGUCGUGCUGAAGAAGUUCAGp      | 6832   | 21     |
| 5' aagCAGCAGACUUCUUAAGUC       | 7242   | 23     |
| 3' UUCGUCGUGCUGAAGAAGUUCp      | 6770   | 21     |
| 5' aagCAGCAGCAGACUUCUUAAGUCC   | 7547   | 24     |
| 3' UUCGUCGUGCUGAAGAAGUUCAp     | 7099   | 22     |
| 3' UCGUGCUGCUGAAGAAGUUCAp      | 6793   | 21     |

**B**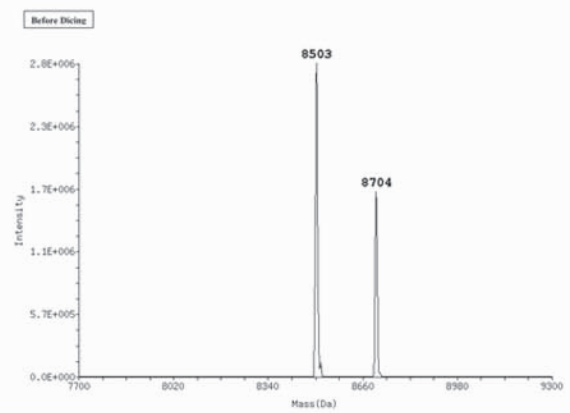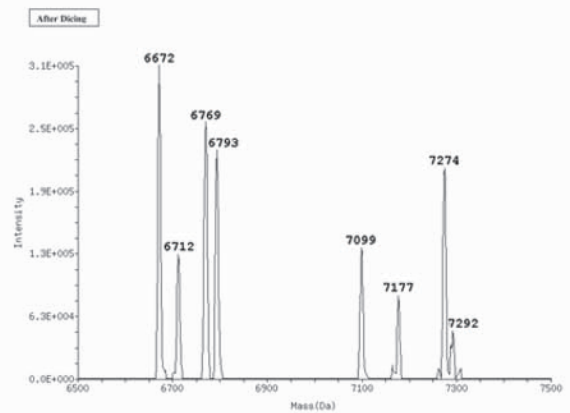

| Sequence: EGFP2 R 27(3'D)/27    | Mol Wt | Length |
|---------------------------------|--------|--------|
| 5' AAGCAGCAGCAGACUUCUUAAGUCCgcc | 8503   | 27     |
| 3' UUCGUCGUGCUGAAGAAGUUCAGGCGG  | 8705   | 27     |
| 5' pAGCAGCAGACUUCUUAAGUCCgcc    | 7274   | 23     |
| 3' CGUCGUGCUGAAGAAGUUCAGGp      | 7177   | 22     |
| 5' pCAGCAGCAGACUUCUUAAGUCC      | 6672   | 21     |
| 3' UCGUGCUGCUGAAGAAGUUCAp       | 6793   | 21     |
| 5' pCAGCAGCAGACUUCUUAAGUC       | 6712   | 21     |
| 3' UUCGUCGUGCUGAAGAAGUUCp       | 6770   | 21     |
| 3' UUCGUCGUGCUGAAGAAGUUCAp      | 7099   | 22     |

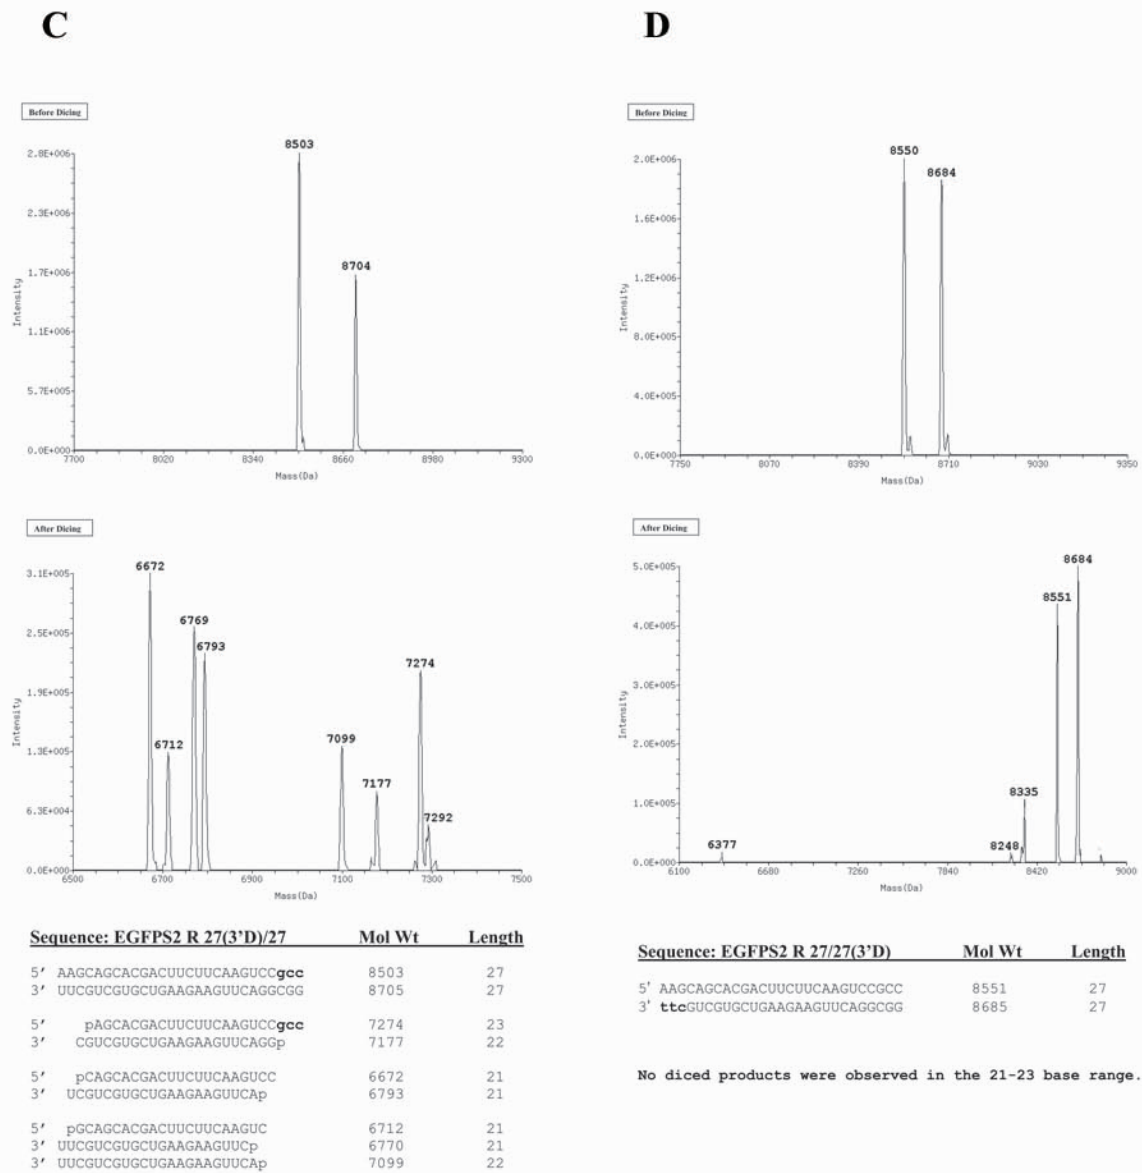

**Figure S1. ESI-MS analysis of in vitro dicing reactions.** Mass spectra of duplexes are shown before (top) and after (middle) digestion with recombinant human Dicer. Sequence of the substrate RNA duplex is provide with detected cleavage products along with calculated molecular weight and strand length (bottom). RNA bases are upper case, DNA bases are lower case bold, and “p” represents 5’-phosphate. A) blunt duplex EGFPS2 R 27(5’D)/27; B) blunt duplex EGFPS2 R 27(3’D)/27; C) blunt duplex EGFPS2 R 27/27(5’D); D) blunt duplex EGFPS2 R 27/27(3’D).

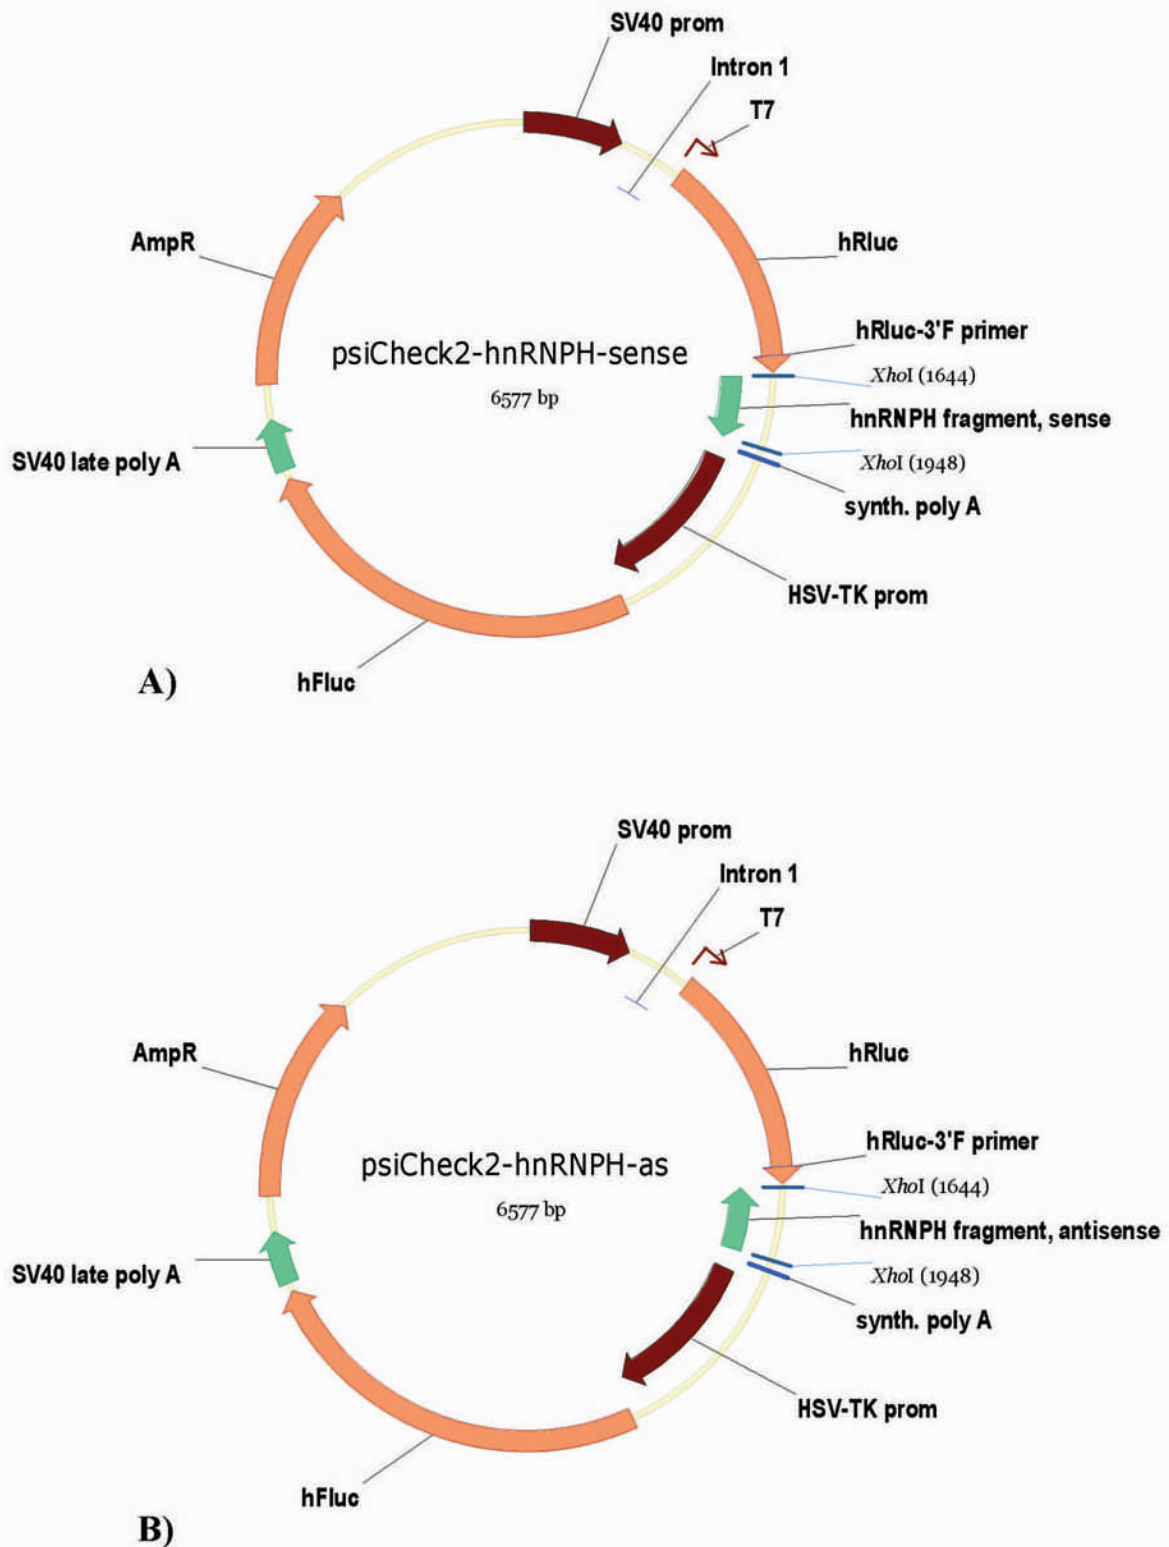

**Figure S2. Map of hnRNPH “S” and “AS” targeting vectors.** A fragment of the hnRNPH gene was cloned into the 3'-UTR of the Renilla luciferase gene in vector psiCheck-2™. Relative locations of the internal control firefly luciferase coding region, Renilla luciferase coding regions with inserted hnRNPH sequences in A) sense and B) antisense orientations are shown.

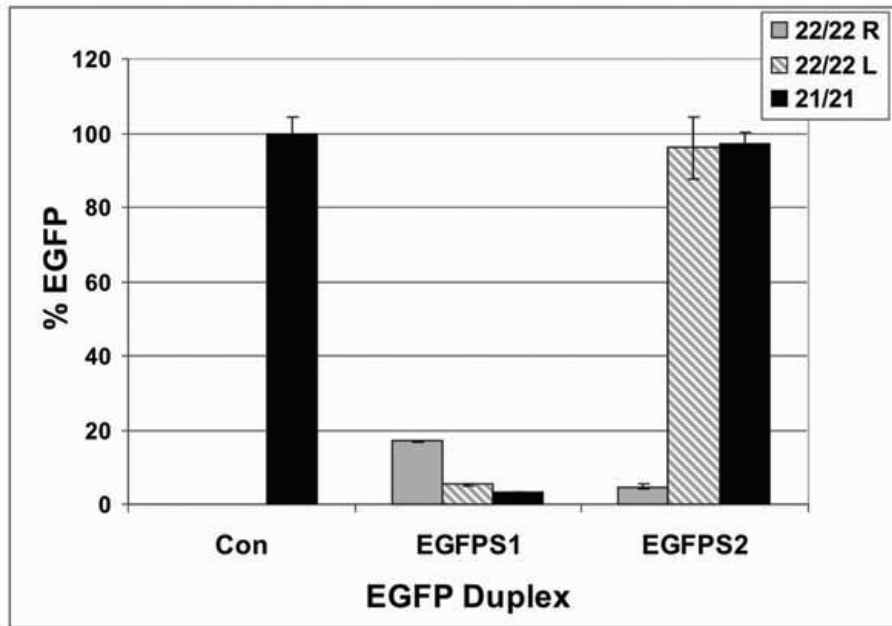

5' **caagctgaccctgaagttcatctgcaccaccggcaa** EGFP Site-1

5' ACCCUGAAGUUCAUCUGCACC EGFPS1 21/21  
 3' ACUGGGACUUCAAGUAGACGU

5' ACCCUGAAGUUCAUCUGCACCA EGFPS1 R 22/22  
 3' ACUGGGACUUCAAGUAGACGUG

5' GACCCUGAAGUUCAUCUGCACC EGFPS1 L 22/22  
 3' GACUGGGACUUCAAGUAGACGU

5' **ccatgaagcagcagcagacttcttcaagtccgcatgc** EGFP Site-2

5' GCAGCAGGACUUCUUAAGUC EGFPS2 21/21  
 3' UUCGUCGUGCUGAAGAAGUUC

5' GCAGCAGGACUUCUUAAGUCC EGFPS2 R 22/22  
 3' UUCGUCGUGCUGAAGAAGUUA

5' AGCAGCAGGACUUCUUAAGUC EGFPS2 L 22/22  
 3' CUUCGUCGUGCUGAAGAAGUUC

**Figure S3. Evaluation of 22mer products derived from Dicing “L” and “R” forms.**  
 Top panel: relative expression data are shown. Bottom panel: target sequences (S strand) are shown and transfected RNAi duplexes are aligned beneath in duplex form with S strand top (5' → 3') and AS strand bottom (3' → 5'). Relative EGFP fluorescence was measured following co-transfection of an EGFP expression plasmid with 1 nM concentration of the indicated duplexes.
